# Supplementary material
Source: publisher figshare collection journal article supplement (https://acs.figshare.com/ndownloader/files/5055868)
Supplement: Supplementary file 1 [file 5055868]

data_global


#==============================================================================
#                          1. SUBMISSION DETAILS
#==============================================================================


_publ_contact_author_name   'Dr Davit Zargarian'

_publ_contact_author_address
;
      Universit\'e de Montr\'eal
      D\'epartement de Chimie
      C.P. 6128, Succ. Centre-ville
      Montr\'eal, Qu\'ebec
      Canada, H3C 3J7
;


_publ_contact_author_phone        '+1 514 343 2247'
_publ_contact_author_fax          '+1 514 343 7586'
_publ_contact_author_email        'zargarian.davit@umontreal.ca'

_publ_requested_journal           'Organometallics'
_publ_requested_category          ''


_publ_requested_coeditor_name
;
     Dr Anthony Linden
     Institute of Organic Chemistry
     University of Zurich
     Winterthurerstrasse 190
     CH-8057 Zurich, Switzerland
;


_publ_contact_letter
;

Please consider this CIF submission for publication in Acta Crystallographica
Section C.  All authors have seen and approved of this submission.

The CIF has passed the Chester CHECKCIF routines and gives a satisfactory
PRINTCIF file.

When I hear back from you by e-mail with your reference number I will fax and
air-mail a formal Letter of Submission and a signed Copyright Transfer Form.

I will then ftp the Artwork and Structure Factor Listing to you (as Postscript
and ASCII files respectively).


                 
;

#==============================================================================
#                   2. PROCESSING SUMMARY (IUCr Office Use Only)
#==============================================================================


_journal_date_recd_electronic     ?

_journal_date_to_coeditor         ?
_journal_date_from_coeditor       ?
_journal_date_accepted            ?

_journal_date_printers_first      ?
_journal_date_printers_final      ?
_journal_date_proofs_out          ?
_journal_date_proofs_in           ?

_journal_coeditor_name            ?
_journal_coeditor_code            ?
_journal_coeditor_notes
; ?
;

_journal_techeditor_code          ?
_journal_techeditor_notes
; ?
;

_journal_coden_ASTM               ?
_journal_name_full                ?
_journal_year                     ?
_journal_volume                   ?
_journal_issue                    ?
_journal_page_first               ?
_journal_page_last                ?

_journal_suppl_publ_number        ?
_journal_suppl_publ_pages         ?

#==============================================================================
#                        3. TITLE AND AUTHOR LIST
#==============================================================================


_publ_section_title
;
Structure of complex 3
;

# The loop structure below should contain the names and addresses of all
# authors, in the required order of publication. Repeat as necessary.

loop_
    _publ_author_name
    _publ_author_address
     'Zargarian, Davit'
;
      D\'epartement de Chimie
      Universit\'e de Montr\'eal
      C.P. 6128, Succ. Centre-ville,
      Montr\'eal, Qu\'ebec
      Canada H3C 3J7

;
      'Sui-Seng ,Christine '
;
      D\'epartement de Chimie
      Universit\'e de Montr\'eal
      C.P. 6128, Succ. Centre-ville,
      Montr\'eal, Qu\'ebec
      Canada H3C 3J7

;

#==============================================================================
#                              4. TEXT
#==============================================================================


_publ_section_abstract
;
 Here should be written a short abstract
;


_publ_section_comment
;
 Here should be written the text  of the article
;


_publ_section_exptl_prep
;
 Small details about the preparation of the compound.
;


_publ_section_exptl_refinement
;

All non-H atoms were refined by full-matrix least-squares
with anisotropic displacement parameters. The H atoms were 
generated geometrically (C-H 0.93 to 0.98, N-H 0.86 and O-H 0.82\%A)
and were included in the refinement in the riding model approximation; 
their temperature factors were set to 1.5 times those of the 
equivalent isotropic temperature factors of the parent site (methyl) 
and 1.2 times for others. 
A final verification of possible voids was performed using the VOID routine 
of the PLATON program (Spek, 2000). 
  

;


_publ_section_references
;

 
 Bruker (1997). SHELXTL (1997). Release 5.10; The Complete Software Package 
 for Single Crystal Structure Determination.  Bruker AXS Inc.,
 Madison, USA.

 Bruker (1999a). SAINT Release 6.06. Integration Software for Single Crystal 
 Data. Bruker AXS Inc., Madison, USA.

 Bruker (1999b). SMART Release 5.059; Bruker Molecular Analysis Research Tool,
 Bruker AXS Inc., Madison, USA.

 Flack, H. D. (1983). Acta Cryst. A39, 876-881.

 Flack, H. D. and Schwarzenbach, D. (1988). Acta Cryst. A44, 499-506.

 Sheldrick, G. M. (1986). SHELXS86. Program for Crystal Structure
 solution. University of G\"ottingen, Germany.

 Sheldrick, G. M. (1996). SADABS, Bruker Area Detector Absorption Corrections.
 Bruker AXS Inc., Madison, USA.

 Sheldrick, G. M. (1997a). SHELXS97. Program for Crystal Structure
 solution. University of G\"ottingen, Germany.

 Sheldrick, G. M. (1997b). SHELXL97. Program for crystal structure
 refinement. University of G\"ottingen, Germany.

 Spek, A. L. (2000). PLATON,  2000 version; Molecular Geometry Program,
 University of Utrecht, Utrecht, Holland.


;


_publ_section_figure_captions
;
Fig 1 Ortep view of the title compound.
      Thermal ellipsoids are shown at 30% probability levels.
;


_publ_section_table_legends
;
Table 1.  Selected geometric parameters (\%A, \%) for the title compound.
;


_publ_section_acknowledgements
;
We are grateful to the Natural Sciences and Engineering Research
Council of Canada and the Minist\`ere de l'Education du Qu\'ebec
for financial support.
;

# ========================================================
#                     STRUCTURAL DATA                     
# ========================================================


 
data_suse23 
 
_audit_creation_method            SHELXL-97 
_chemical_name_systematic 
; 
 ? 
; 
_chemical_name_common             ? 
_chemical_melting_point           ? 
_chemical_formula_moiety          ? 
_chemical_formula_sum 
 'C15 H22 Cl N Pd' 
_chemical_formula_weight          358.19 
_chemical_compound_source         'Synthesized by the authors. See text'

loop_ 
 _atom_type_symbol 
 _atom_type_description 
 _atom_type_scat_dispersion_real 
 _atom_type_scat_dispersion_imag 
 _atom_type_scat_source 
 'C'  'C'   0.0181   0.0091 
 'International Tables Vol C Tables 4.2.6.8 and 6.1.1.4' 
 'H'  'H'   0.0000   0.0000 
 'International Tables Vol C Tables 4.2.6.8 and 6.1.1.4' 
 'N'  'N'   0.0311   0.0180 
 'International Tables Vol C Tables 4.2.6.8 and 6.1.1.4' 
 'Cl'  'Cl'   0.3639   0.7018 
 'International Tables Vol C Tables 4.2.6.8 and 6.1.1.4' 
 'Pd'  'Pd'   0.1215   3.9337 
 'International Tables Vol C Tables 4.2.6.8 and 6.1.1.4' 
 
_symmetry_cell_setting            Monoclinic
_symmetry_space_group_name_H-M    P21/c
_symmetry_space_group_name_hall   '-P 2ybc'
 
loop_ 
 _symmetry_equiv_pos_as_xyz 
 'x, y, z' 
 '-x, y+1/2, -z+1/2' 
 '-x, -y, -z' 
 'x, -y-1/2, z-1/2' 
 
_cell_length_a                    8.77560(10) 
_cell_length_b                    13.9797(2) 
_cell_length_c                    12.42090(10) 
_cell_angle_alpha                 90.00 
_cell_angle_beta                  95.3970(10) 
_cell_angle_gamma                 90.00 
_cell_volume                      1517.04(3) 
_cell_formula_units_Z             4 
_cell_measurement_temperature     100(2)
_cell_measurement_reflns_used     7669
_cell_measurement_theta_min        3.16
_cell_measurement_theta_max       72.84
 
_exptl_crystal_description        block
_exptl_crystal_colour             brown
_exptl_crystal_size_max           0.53
_exptl_crystal_size_mid           0.23
_exptl_crystal_size_min           0.08
_exptl_crystal_density_meas          ?
_exptl_crystal_density_diffrn     1.568 
_exptl_crystal_density_method     'not measured' 
_exptl_crystal_F_000              728 
_exptl_absorpt_coefficient_mu     11.331 
_exptl_absorpt_correction_Type    multi-scan
_exptl_absorpt_correction_T_min   0.1600
_exptl_absorpt_correction_T_max   0.5600
_exptl_absorpt_process_details    'Sadabs (Sheldrick,1996)'
 
_exptl_special_details
;
X-ray crystallographic data for I were collected from a single crystal
sample, which was mounted on a loop fiber. Data were collected using
a Bruker Platform diffractometer, equipped with a Bruker SMART 2K
Charged-Coupled Device (CCD) Area Detector using the program SMART and
normal focus sealed tube source graphite monochromated Cu-K\a radiation.
The crystal-to-detector distance was 4.908 cm, and the data collection
was carried out in 512 x 512 pixel mode, utilizing 4 x 4 pixel binning.
The initial unit cell parameters were determined by a least-squares fit
of the angular setting of strong reflections, collected by a 9.0 degree
scan in 30 frames over four different parts of the reciprocal space
(120 frames total).  One complete sphere of data was collected, to
better than 0.8\%A resolution.  Upon completion of the data collection,
the first 101 frames were recollected in order to improve the decay
correction analysis.
;
 
_diffrn_ambient_temperature       100(2)
_diffrn_radiation_wavelength      1.54178 
_diffrn_radiation_type            CuK\a 
_diffrn_radiation_source          'Sealed Tube'
_diffrn_radiation_monochromator   'graphite'
_diffrn_measurement_device_type   'Bruker Smart 2000'
_diffrn_measurement_method        '\w'
_diffrn_detector_area_resol_mean   5.5
_diffrn_standards_number          139
_diffrn_standards_interval_count  ? 
_diffrn_standards_interval_time   ? 
_diffrn_standards_decay_%          -0.02
_diffrn_reflns_number             18428
_diffrn_reflns_av_R_equivalents   0.055
_diffrn_reflns_av_sigmaI/netI     0.0241 
_diffrn_reflns_limit_h_min        -10
_diffrn_reflns_limit_h_max        10
_diffrn_reflns_limit_k_min        -17
_diffrn_reflns_limit_k_max        17
_diffrn_reflns_limit_l_min        -15
_diffrn_reflns_limit_l_max        14
_diffrn_reflns_theta_min          4.77 
_diffrn_reflns_theta_max          72.91 
_reflns_number_total              3002
_reflns_number_gt                 2908
_reflns_threshold_expression      'I>2\s(I)'
 
_computing_data_collection        'SMART (Bruker, 1999)'
_computing_cell_refinement        'SMART (Bruker, 1999)'
_computing_data_reduction         'SAINT (Bruker, 1999)'
_computing_structure_solution     'SHELXS97 (Sheldrick, 1997)'
_computing_structure_refinement   'SHELXL97 (Sheldrick, 1997)'
_computing_molecular_graphics     'SHELXTL (Bruker, 1997)'
_computing_publication_material   'UdMX (local program)'
 
_refine_special_details 
; 
 Refinement of F^2^ against ALL reflections.  The weighted R-factor wR and 
 goodness of fit S are based on F^2^, conventional R-factors R are based 
 on F, with F set to zero for negative F^2^. The threshold expression of 
 F^2^ > 2sigma(F^2^) is used only for calculating R-factors(gt) etc. and is 
 not relevant to the choice of reflections for refinement.  R-factors based 
 on F^2^ are statistically about twice as large as those based on F, and R- 
 factors based on ALL data will be even larger. 
; 
 
_refine_ls_structure_factor_coef  Fsqd  
_refine_ls_matrix_type            full 
_refine_ls_weighting_scheme       calc  
_refine_ls_weighting_details 
 'calc w=1/[\s^2^(Fo^2^)+(0.0532P)^2^+0.7659P] where P=(Fo^2^+2Fc^2^)/3' 
_atom_sites_solution_primary      direct 
_atom_sites_solution_secondary    difmap 
_atom_sites_solution_hydrogens    geom 
_refine_ls_hydrogen_treatment     constr
_refine_ls_extinction_method      none 
_refine_ls_extinction_coef        ? 
_refine_ls_number_reflns          3002 
_refine_ls_number_parameters      166 
_refine_ls_number_restraints      0 
_refine_ls_R_factor_all           0.0288 
_refine_ls_R_factor_gt            0.0280 
_refine_ls_wR_factor_ref          0.0742 
_refine_ls_wR_factor_gt           0.0735 
_refine_ls_goodness_of_fit_ref    1.043 
_refine_ls_restrained_S_all       1.043 
_refine_ls_shift/su_max           0.001 
_refine_ls_shift/su_mean          0.000 
 
loop_ 
 _atom_site_label 
 _atom_site_type_symbol 
 _atom_site_fract_x 
 _atom_site_fract_y 
 _atom_site_fract_z 
 _atom_site_U_iso_or_equiv 
 _atom_site_adp_type 
 _atom_site_occupancy 
 _atom_site_symmetry_multiplicity 
 _atom_site_calc_flag 
 _atom_site_refinement_flags 
 _atom_site_disorder_assembly 
 _atom_site_disorder_group 
Pd Pd 0.627770(17) 0.168045(10) 0.474567(12) 0.01694(9) Uani 1 1 d . . . 
Cl Cl 0.68692(6) 0.09135(3) 0.31445(4) 0.02430(13) Uani 1 1 d . . . 
N N 0.8466(2) 0.24074(13) 0.49634(15) 0.0181(4) Uani 1 1 d . . . 
C1 C 0.3917(3) 0.12524(16) 0.4687(2) 0.0260(5) Uani 1 1 d . . . 
H1 H 0.3786 0.0698 0.4245 0.031 Uiso 1 1 calc R . . 
C2 C 0.4519(3) 0.12706(16) 0.5774(2) 0.0274(5) Uani 1 1 d . . . 
H2 H 0.4641 0.0736 0.6247 0.033 Uiso 1 1 calc R . . 
C3 C 0.4908(3) 0.22237(16) 0.60351(19) 0.0225(5) Uani 1 1 d . . . 
H3 H 0.5568 0.2430 0.6641 0.027 Uiso 1 1 calc R . . 
C3A C 0.4112(3) 0.28472(16) 0.52054(19) 0.0201(4) Uani 1 1 d . . . 
C4 C 0.3966(3) 0.38307(17) 0.5127(2) 0.0238(5) Uani 1 1 d . . . 
H4 H 0.4344 0.4236 0.5706 0.029 Uiso 1 1 calc R . . 
C5 C 0.3247(3) 0.42096(17) 0.4170(2) 0.0290(5) Uani 1 1 d . . . 
H5 H 0.3115 0.4882 0.4106 0.035 Uiso 1 1 calc R . . 
C6 C 0.2720(3) 0.3626(2) 0.3313(2) 0.0309(6) Uani 1 1 d . . . 
H6 H 0.2265 0.3906 0.2664 0.037 Uiso 1 1 calc R . . 
C7 C 0.2847(3) 0.26299(19) 0.3389(2) 0.0283(5) Uani 1 1 d . . . 
H7 H 0.2482 0.2230 0.2802 0.034 Uiso 1 1 calc R . . 
C7A C 0.3520(3) 0.22425(16) 0.4344(2) 0.0215(5) Uani 1 1 d . . . 
C8 C 0.9734(3) 0.16940(15) 0.5095(2) 0.0227(5) Uani 1 1 d . . . 
H8A H 1.0718 0.2040 0.5232 0.027 Uiso 1 1 calc R . . 
H8B H 0.9761 0.1336 0.4410 0.027 Uiso 1 1 calc R . . 
C9 C 0.9594(3) 0.09851(17) 0.6006(2) 0.0276(5) Uani 1 1 d . . . 
H9A H 0.9620 0.1329 0.6695 0.041 Uiso 1 1 calc R . . 
H9B H 1.0448 0.0531 0.6034 0.041 Uiso 1 1 calc R . . 
H9C H 0.8625 0.0637 0.5879 0.041 Uiso 1 1 calc R . . 
C10 C 0.8471(3) 0.30561(16) 0.59232(18) 0.0208(4) Uani 1 1 d . . . 
H10A H 0.8381 0.2656 0.6572 0.025 Uiso 1 1 calc R . . 
H10B H 0.7547 0.3464 0.5826 0.025 Uiso 1 1 calc R . . 
C11 C 0.9862(3) 0.37069(19) 0.6150(2) 0.0294(5) Uani 1 1 d . . . 
H11A H 1.0799 0.3322 0.6187 0.044 Uiso 1 1 calc R . . 
H11B H 0.9801 0.4038 0.6840 0.044 Uiso 1 1 calc R . . 
H11C H 0.9880 0.4179 0.5568 0.044 Uiso 1 1 calc R . . 
C12 C 0.8679(3) 0.29714(16) 0.39601(18) 0.0207(4) Uani 1 1 d . . . 
H12A H 0.8710 0.2523 0.3346 0.025 Uiso 1 1 calc R . . 
H12B H 0.9679 0.3303 0.4058 0.025 Uiso 1 1 calc R . . 
C13 C 0.7432(3) 0.37083(16) 0.36752(19) 0.0249(5) Uani 1 1 d . . . 
H13A H 0.6428 0.3398 0.3645 0.037 Uiso 1 1 calc R . . 
H13B H 0.7573 0.3992 0.2970 0.037 Uiso 1 1 calc R . . 
H13C H 0.7492 0.4211 0.4228 0.037 Uiso 1 1 calc R . . 
 
loop_ 
 _atom_site_aniso_label 
 _atom_site_aniso_U_11 
 _atom_site_aniso_U_22 
 _atom_site_aniso_U_33 
 _atom_site_aniso_U_23 
 _atom_site_aniso_U_13 
 _atom_site_aniso_U_12 
Pd 0.01974(13) 0.01070(12) 0.02191(13) 0.00129(4) 0.01006(8) 0.00117(4) 
Cl 0.0333(3) 0.0149(2) 0.0268(3) -0.00333(18) 0.0141(2) -0.00224(19) 
N 0.0199(8) 0.0162(9) 0.0193(8) 0.0014(7) 0.0077(7) 0.0018(7) 
C1 0.0234(11) 0.0136(10) 0.0437(14) -0.0028(9) 0.0173(10) -0.0021(8) 
C2 0.0290(12) 0.0167(11) 0.0398(14) 0.0103(9) 0.0210(11) 0.0052(9) 
C3 0.0224(11) 0.0216(11) 0.0256(11) 0.0033(9) 0.0134(9) 0.0041(9) 
C3A 0.0177(10) 0.0167(11) 0.0274(12) 0.0009(8) 0.0112(8) 0.0009(9) 
C4 0.0226(10) 0.0158(11) 0.0347(12) 0.0000(9) 0.0124(10) 0.0016(9) 
C5 0.0249(12) 0.0198(11) 0.0442(14) 0.0082(10) 0.0139(11) 0.0050(9) 
C6 0.0201(11) 0.0367(14) 0.0369(14) 0.0131(12) 0.0079(10) 0.0056(10) 
C7 0.0186(11) 0.0348(13) 0.0325(12) -0.0037(10) 0.0075(9) -0.0035(9) 
C7A 0.0167(10) 0.0173(10) 0.0325(12) -0.0015(9) 0.0124(9) -0.0025(8) 
C8 0.0199(12) 0.0222(12) 0.0269(12) -0.0001(8) 0.0078(10) 0.0060(8) 
C9 0.0282(12) 0.0250(12) 0.0298(12) 0.0040(9) 0.0042(10) 0.0077(9) 
C10 0.0243(11) 0.0177(10) 0.0214(10) 0.0002(8) 0.0072(9) 0.0034(9) 
C11 0.0277(12) 0.0303(13) 0.0303(12) -0.0040(10) 0.0043(10) -0.0026(10) 
C12 0.0226(11) 0.0194(11) 0.0216(11) 0.0019(8) 0.0095(9) -0.0004(8) 
C13 0.0298(12) 0.0210(11) 0.0250(11) 0.0049(9) 0.0076(10) 0.0017(9) 
 
_geom_special_details 
; 
 All esds (except the esd in the dihedral angle between two l.s. planes) 
 are estimated using the full covariance matrix.  The cell esds are taken 
 into account individually in the estimation of esds in distances, angles 
 and torsion angles; correlations between esds in cell parameters are only 
 used when they are defined by crystal symmetry.  An approximate (isotropic) 
 treatment of cell esds is used for estimating esds involving l.s. planes. 
; 
 


loop_                                         
        _geom_bond_atom_site_label_1          
        _geom_bond_atom_site_label_2          
        _geom_bond_site_symmetry_1            
        _geom_bond_site_symmetry_2            
        _geom_bond_distance                   
        _geom_bond_publ_flag                  
Pd             C1             .              .                     2.151(2)   Y
Pd             N              .              .                   2.1674(18)   Y
Pd             C2             .              .                     2.171(2)   Y
Pd             C3             .              .                     2.225(2)   Y
Pd             Cl             .              .                    2.3598(5)   Y
Pd             C7a            .              .                     2.548(2)   Y
Pd             C3a            .              .                     2.608(2)   Y
N              C8             .              .                     1.491(3)   Y
N              C10            .              .                     1.498(3)   Y
N              C12            .              .                     1.501(3)   Y
C1             C2             .              .                     1.403(4)   Y
C1             C7a            .              .                     1.480(3)   Y
C1             H1             .              .                         0.95   ?
C2             C3             .              .                     1.406(3)   Y
C2             H2             .              .                         0.95   ?
C3             C3a            .              .                     1.474(3)   Y
C3             H3             .              .                         0.95   ?
C3a            C4             .              .                     1.383(4)   Y
C3a            C7a            .              .                     1.422(3)   Y
C4             C5             .              .                     1.396(3)   Y
C4             H4             .              .                         0.95   ?
C5             C6             .              .                     1.386(4)   Y
C5             H5             .              .                         0.95   ?
C6             C7             .              .                     1.399(4)   Y
C6             H6             .              .                         0.95   ?
C7             C7a            .              .                     1.385(3)   Y
C7             H7             .              .                         0.95   ?
C8             C9             .              .                     1.518(3)   Y
C8             H8a            .              .                         0.99   ?
C8             H8b            .              .                         0.99   ?
C9             H9a            .              .                         0.98   ?
C9             H9b            .              .                         0.98   ?
C9             H9c            .              .                         0.98   ?
C10            C11            .              .                     1.527(3)   Y
C10            H10a           .              .                         0.99   ?
C10            H10b           .              .                         0.99   ?
C11            H11a           .              .                         0.98   ?
C11            H11b           .              .                         0.98   ?
C11            H11c           .              .                         0.98   ?
C12            C13            .              .                     1.520(3)   Y
C12            H12a           .              .                         0.99   ?
C12            H12b           .              .                         0.99   ?
C13            H13a           .              .                         0.98   ?
C13            H13b           .              .                         0.98   ?
C13            H13c           .              .                         0.98   ?

loop_                                         
        _geom_angle_atom_site_label_1         
        _geom_angle_atom_site_label_2         
        _geom_angle_atom_site_label_3         
        _geom_angle_site_symmetry_1           
        _geom_angle_site_symmetry_2           
        _geom_angle_site_symmetry_3           
        _geom_angle                           
        _geom_angle_publ_flag                 
C1        PD        N         .         .         .          166.93(8)        Y
C1        PD        C2        .         .         .          37.88(10)        Y
N         PD        C2        .         .         .          136.16(9)        Y
C1        PD        C3        .         .         .           62.32(9)        Y
N         PD        C3        .         .         .          106.42(8)        Y
C2        PD        C3        .         .         .           37.28(9)        Y
C1        PD        CL        .         .         .           97.61(7)        Y
N         PD        CL        .         .         .           93.19(5)        Y
C2        PD        CL        .         .         .          126.92(7)        Y
C3        PD        CL        .         .         .          159.79(7)        Y
C1        PD        C7A       .         .         .           35.45(8)        Y
N         PD        C7A       .         .         .          133.94(7)        Y
C2        PD        C7A       .         .         .           58.79(8)        Y
C3        PD        C7A       .         .         .           57.87(8)        Y
CL        PD        C7A       .         .         .          104.79(6)        Y
C1        PD        C3A       .         .         .           57.46(8)        Y
N         PD        C3A       .         .         .          109.57(7)        Y
C2        PD        C3A       .         .         .           57.53(8)        Y
C3        PD        C3A       .         .         .           34.38(8)        Y
CL        PD        C3A       .         .         .          133.73(5)        Y
C7A       PD        C3A       .         .         .           32.00(7)        Y
C8        N         C10       .         .         .         111.79(18)        Y
C8        N         C12       .         .         .         107.03(17)        Y
C10       N         C12       .         .         .         110.58(17)        Y
C8        N         PD        .         .         .         110.07(13)        Y
C10       N         PD        .         .         .         108.63(13)        Y
C12       N         PD        .         .         .         108.69(13)        Y
C2        C1        C7A       .         .         .           108.5(2)        Y
C2        C1        PD        .         .         .          71.83(13)        Y
C7A       C1        PD        .         .         .          87.09(13)        Y
C2        C1        H1        .         .         .              125.8        ?
C7A       C1        H1        .         .         .              125.8        ?
PD        C1        H1        .         .         .              108.1        ?
C1        C2        C3        .         .         .           107.5(2)        Y
C1        C2        PD        .         .         .          70.30(13)        Y
C3        C2        PD        .         .         .          73.44(13)        Y
C1        C2        H2        .         .         .              126.2        ?
C3        C2        H2        .         .         .              126.2        ?
PD        C2        H2        .         .         .              121.7        ?
C2        C3        C3A       .         .         .           108.1(2)        Y
C2        C3        PD        .         .         .          69.28(13)        Y
C3A       C3        PD        .         .         .          87.19(14)        Y
C2        C3        H3        .         .         .                126        ?
C3A       C3        H3        .         .         .                126        ?
PD        C3        H3        .         .         .                110        ?
C4        C3A       C7A       .         .         .           120.8(2)        Y
C4        C3A       C3        .         .         .           132.2(2)        Y
C7A       C3A       C3        .         .         .           106.8(2)        Y
C4        C3A       PD        .         .         .         132.11(15)        Y
C7A       C3A       PD        .         .         .          71.68(13)        Y
C3        C3A       PD        .         .         .          58.43(12)        Y
C3A       C4        C5        .         .         .           117.9(2)        Y
C3A       C4        H4        .         .         .                121        ?
C5        C4        H4        .         .         .                121        ?
C6        C5        C4        .         .         .           121.4(2)        Y
C6        C5        H5        .         .         .              119.3        ?
C4        C5        H5        .         .         .              119.3        ?
C5        C6        C7        .         .         .           121.0(2)        Y
C5        C6        H6        .         .         .              119.5        ?
C7        C6        H6        .         .         .              119.5        ?
C7A       C7        C6        .         .         .           118.2(2)        Y
C7A       C7        H7        .         .         .              120.9        ?
C6        C7        H7        .         .         .              120.9        ?
C7        C7A       C3A       .         .         .           120.5(2)        Y
C7        C7A       C1        .         .         .           133.0(2)        Y
C3A       C7A       C1        .         .         .           106.3(2)        Y
C7        C7A       PD        .         .         .         127.51(17)        Y
C3A       C7A       PD        .         .         .          76.32(13)        Y
C1        C7A       PD        .         .         .          57.46(12)        Y
N         C8        C9        .         .         .           114.0(2)        Y
N         C8        H8A       .         .         .              108.8        ?
C9        C8        H8A       .         .         .              108.8        ?
N         C8        H8B       .         .         .              108.8        ?
C9        C8        H8B       .         .         .              108.8        ?
H8A       C8        H8B       .         .         .              107.6        ?
C8        C9        H9A       .         .         .              109.5        ?
C8        C9        H9B       .         .         .              109.5        ?
H9A       C9        H9B       .         .         .              109.5        ?
C8        C9        H9C       .         .         .              109.5        ?
H9A       C9        H9C       .         .         .              109.5        ?
H9B       C9        H9C       .         .         .              109.5        ?
N         C10       C11       .         .         .         116.73(19)        Y
N         C10       H10A      .         .         .              108.1        ?
C11       C10       H10A      .         .         .              108.1        ?
N         C10       H10B      .         .         .              108.1        ?
C11       C10       H10B      .         .         .              108.1        ?
H10A      C10       H10B      .         .         .              107.3        ?
C10       C11       H11A      .         .         .              109.5        ?
C10       C11       H11B      .         .         .              109.5        ?
H11A      C11       H11B      .         .         .              109.5        ?
C10       C11       H11C      .         .         .              109.5        ?
H11A      C11       H11C      .         .         .              109.5        ?
H11B      C11       H11C      .         .         .              109.5        ?
N         C12       C13       .         .         .         113.99(18)        Y
N         C12       H12A      .         .         .              108.8        ?
C13       C12       H12A      .         .         .              108.8        ?
N         C12       H12B      .         .         .              108.8        ?
C13       C12       H12B      .         .         .              108.8        ?
H12A      C12       H12B      .         .         .              107.6        ?
C12       C13       H13A      .         .         .              109.5        ?
C12       C13       H13B      .         .         .              109.5        ?
H13A      C13       H13B      .         .         .              109.5        ?
C12       C13       H13C      .         .         .              109.5        ?
H13A      C13       H13C      .         .         .              109.5        ?
H13B      C13       H13C      .         .         .              109.5        ?

loop_                                         
        _geom_torsion_atom_site_label_1       
        _geom_torsion_atom_site_label_2       
        _geom_torsion_atom_site_label_3       
        _geom_torsion_atom_site_label_4       
        _geom_torsion_site_symmetry_1         
        _geom_torsion_site_symmetry_2         
        _geom_torsion_site_symmetry_3         
        _geom_torsion_site_symmetry_4         
        _geom_torsion                         
        _geom_torsion_publ_flag               
C1      PD      N       C8      .       .       .       .          153.1(3)   Y
C2      PD      N       C8      .       .       .       .         96.68(17)   Y
C3      PD      N       C8      .       .       .       .        123.72(15)   Y
CL      PD      N       C8      .       .       .       .        -61.24(14)   Y
C7A     PD      N       C8      .       .       .       .       -175.36(14)   Y
C3A     PD      N       C8      .       .       .       .        159.78(14)   Y
C1      PD      N       C10     .       .       .       .           30.3(4)   Y
C2      PD      N       C10     .       .       .       .        -26.02(18)   Y
C3      PD      N       C10     .       .       .       .          1.02(15)   Y
CL      PD      N       C10     .       .       .       .        176.06(13)   Y
C7A     PD      N       C10     .       .       .       .         61.93(17)   Y
C3A     PD      N       C10     .       .       .       .         37.07(15)   Y
C1      PD      N       C12     .       .       .       .          -90.0(4)   Y
C2      PD      N       C12     .       .       .       .       -146.40(13)   Y
C3      PD      N       C12     .       .       .       .       -119.36(14)   Y
CL      PD      N       C12     .       .       .       .         55.69(13)   Y
C7A     PD      N       C12     .       .       .       .        -58.44(16)   Y
C3A     PD      N       C12     .       .       .       .        -83.30(14)   Y
N       PD      C1      C2      .       .       .       .          -69.9(4)   Y
C3      PD      C1      C2      .       .       .       .        -37.90(13)   Y
CL      PD      C1      C2      .       .       .       .        144.63(12)   Y
C7A     PD      C1      C2      .       .       .       .       -110.51(19)   Y
C3A     PD      C1      C2      .       .       .       .        -77.47(14)   Y
N       PD      C1      C7A     .       .       .       .           40.6(4)   Y
C2      PD      C1      C7A     .       .       .       .        110.51(19)   Y
C3      PD      C1      C7A     .       .       .       .         72.61(14)   Y
CL      PD      C1      C7A     .       .       .       .       -104.86(13)   Y
C3A     PD      C1      C7A     .       .       .       .         33.04(13)   Y
C7A     C1      C2      C3      .       .       .       .          -15.9(2)   Y
PD      C1      C2      C3      .       .       .       .         64.51(15)   Y
C7A     C1      C2      PD      .       .       .       .        -80.45(16)   Y
N       PD      C2      C1      .       .       .       .        162.14(12)   Y
C3      PD      C2      C1      .       .       .       .          116.1(2)   Y
CL      PD      C2      C1      .       .       .       .        -45.87(15)   Y
C7A     PD      C2      C1      .       .       .       .         39.43(13)   Y
C3A     PD      C2      C1      .       .       .       .         77.27(14)   Y
C1      PD      C2      C3      .       .       .       .         -116.1(2)   Y
N       PD      C2      C3      .       .       .       .         46.05(19)   Y
CL      PD      C2      C3      .       .       .       .       -161.96(11)   Y
C7A     PD      C2      C3      .       .       .       .        -76.66(14)   Y
C3A     PD      C2      C3      .       .       .       .        -38.82(13)   Y
C1      C2      C3      C3A     .       .       .       .           17.3(2)   Y
PD      C2      C3      C3A     .       .       .       .         79.73(16)   Y
C1      C2      C3      PD      .       .       .       .        -62.44(15)   Y
C1      PD      C3      C2      .       .       .       .         38.51(15)   Y
N       PD      C3      C2      .       .       .       .       -148.68(14)   Y
CL      PD      C3      C2      .       .       .       .           45.8(2)   Y
C7A     PD      C3      C2      .       .       .       .         79.32(15)   Y
C3A     PD      C3      C2      .       .       .       .          110.5(2)   Y
C1      PD      C3      C3A     .       .       .       .        -72.00(14)   Y
N       PD      C3      C3A     .       .       .       .        100.81(14)   Y
C2      PD      C3      C3A     .       .       .       .         -110.5(2)   Y
CL      PD      C3      C3A     .       .       .       .          -64.7(2)   Y
C7A     PD      C3      C3A     .       .       .       .        -31.18(13)   Y
C2      C3      C3A     C4      .       .       .       .          172.5(2)   Y
PD      C3      C3A     C4      .       .       .       .         -120.4(2)   Y
C2      C3      C3A     C7A     .       .       .       .          -12.0(3)   Y
PD      C3      C3A     C7A     .       .       .       .         55.15(18)   Y
C2      C3      C3A     PD      .       .       .       .        -67.14(15)   Y
C1      PD      C3A     C4      .       .       .       .         -152.0(3)   Y
N       PD      C3A     C4      .       .       .       .           29.8(2)   Y
C2      PD      C3A     C4      .       .       .       .          162.7(3)   Y
C3      PD      C3A     C4      .       .       .       .          120.5(3)   Y
CL      PD      C3A     C4      .       .       .       .          -85.2(2)   Y
C7A     PD      C3A     C4      .       .       .       .         -115.4(3)   Y
C1      PD      C3A     C7A     .       .       .       .        -36.64(14)   Y
N       PD      C3A     C7A     .       .       .       .        145.16(13)   Y
C2      PD      C3A     C7A     .       .       .       .        -81.91(16)   Y
C3      PD      C3A     C7A     .       .       .       .         -124.2(2)   Y
CL      PD      C3A     C7A     .       .       .       .         30.22(16)   Y
C1      PD      C3A     C3      .       .       .       .         87.53(16)   Y
N       PD      C3A     C3      .       .       .       .        -90.67(14)   Y
C2      PD      C3A     C3      .       .       .       .         42.26(15)   Y
CL      PD      C3A     C3      .       .       .       .        154.39(12)   Y
C7A     PD      C3A     C3      .       .       .       .          124.2(2)   Y
C7A     C3A     C4      C5      .       .       .       .           -1.1(3)   Y
C3      C3A     C4      C5      .       .       .       .          173.9(3)   Y
PD      C3A     C4      C5      .       .       .       .           91.5(3)   Y
C3A     C4      C5      C6      .       .       .       .           -1.3(4)   Y
C4      C5      C6      C7      .       .       .       .            2.1(4)   Y
C5      C6      C7      C7A     .       .       .       .           -0.2(4)   Y
C6      C7      C7A     C3A     .       .       .       .           -2.2(3)   Y
C6      C7      C7A     C1      .       .       .       .         -176.1(2)   Y
C6      C7      C7A     PD      .       .       .       .          -98.3(3)   Y
C4      C3A     C7A     C7      .       .       .       .            3.0(3)   Y
C3      C3A     C7A     C7      .       .       .       .         -173.2(2)   Y
PD      C3A     C7A     C7      .       .       .       .         -125.7(2)   Y
C4      C3A     C7A     C1      .       .       .       .        178.31(19)   Y
C3      C3A     C7A     C1      .       .       .       .            2.2(2)   Y
PD      C3A     C7A     C1      .       .       .       .         49.62(14)   Y
C4      C3A     C7A     PD      .       .       .       .          128.7(2)   Y
C3      C3A     C7A     PD      .       .       .       .        -47.44(15)   Y
C2      C1      C7A     C7      .       .       .       .         -177.1(2)   Y
PD      C1      C7A     C7      .       .       .       .          113.1(3)   Y
C2      C1      C7A     C3A     .       .       .       .            8.3(2)   Y
PD      C1      C7A     C3A     .       .       .       .        -61.40(17)   Y
C2      C1      C7A     PD      .       .       .       .         69.74(16)   Y
C1      PD      C7A     C7      .       .       .       .         -122.0(3)   Y
N       PD      C7A     C7      .       .       .       .           69.8(2)   Y
C2      PD      C7A     C7      .       .       .       .         -164.2(2)   Y
C3      PD      C7A     C7      .       .       .       .          151.7(2)   Y
CL      PD      C7A     C7      .       .       .       .          -39.7(2)   Y
C3A     PD      C7A     C7      .       .       .       .          118.2(3)   Y
C1      PD      C7A     C3A     .       .       .       .          119.8(2)   Y
N       PD      C7A     C3A     .       .       .       .        -48.37(17)   Y
C2      PD      C7A     C3A     .       .       .       .         77.59(15)   Y
C3      PD      C7A     C3A     .       .       .       .         33.49(13)   Y
CL      PD      C7A     C3A     .       .       .       .       -157.90(12)   Y
N       PD      C7A     C1      .       .       .       .       -168.21(14)   Y
C2      PD      C7A     C1      .       .       .       .        -42.25(15)   Y
C3      PD      C7A     C1      .       .       .       .        -86.36(16)   Y
CL      PD      C7A     C1      .       .       .       .         82.26(14)   Y
C3A     PD      C7A     C1      .       .       .       .         -119.8(2)   Y
C10     N       C8      C9      .       .       .       .           65.3(2)   Y
C12     N       C8      C9      .       .       .       .       -173.50(19)   Y
PD      N       C8      C9      .       .       .       .          -55.5(2)   Y
C8      N       C10     C11     .       .       .       .           64.0(3)   Y
C12     N       C10     C11     .       .       .       .          -55.2(3)   Y
PD      N       C10     C11     .       .       .       .       -174.36(16)   Y
C8      N       C12     C13     .       .       .       .        177.41(19)   Y
C10     N       C12     C13     .       .       .       .          -60.6(2)   Y
PD      N       C12     C13     .       .       .       .           58.6(2)   Y


_diffrn_measured_fraction_theta_max    0.993 
_diffrn_reflns_theta_full              72.91 
_diffrn_measured_fraction_theta_full   0.993 
_refine_diff_density_max    0.686 
_refine_diff_density_min   -1.066 
_refine_diff_density_rms    0.103 
